# Supplementary material for: Global hotspots of butterfly diversity in a warming world
Source: Research Square preprint supplement (doi:10.21203/rs.3.rs-4437399/v1), 2024-06-06
Supplement: Supplementary file 1 [file d054a669ccd4d2086c10d232.docx]

**Supplementary Information**

**Global hotspots of butterfly diversity in a warming world**

**Index**

**Supplementary Tables (1-2)**

**Supplementary Figures (1-10)**

**Supplementary Table 1 | Literature sources and data repositories of distribution data.**

| **Title** | **Author & Year** | **Records** | **Access** |
| --- | --- | --- | --- |
| ***Data repositories*** | | | |
| Butterfly species distribution models | Pinkert et al. 2024 | 6,650 species | Single species maps: <https://mol.org/species/>; Dataset: https://doi.org/10.48600/56x3-dx56 |
| Ant species richness and rarity | Kass et al. 2022 | 14,324 (sub-) species | [DataDryad:1748244](https://datadryad.org/stash/downloads/file_stream/1748244); Files: ant_sp_richness_poly_msk.tif & ant_sp_rarity_poly_msk.tif (in results_species/richness_predictions_irs60K) |
| Plant species richness predictions | Kreft & Jetz, 2008 | >10.000 species | Available from authors upon request |
| Amphibians | IUCN.org and Birdlife International | 6,437 species | <iucnredlist.org/resources/spatial-data-download> |
| Reptiles | Roll et al. 2017 | 10,063 species | Available from authors upon request |
| Mammals | Marsh et al. 2022 | 6,360 species | <https://doi.org/10.48600/mol-48vz-p413> |
| Birds | Jetz et al. 2012 | 9,991 species | Available from authors upon request |
| ***Butterfly occurrence records*** | | | |
| Global Biodiversity Information Facility |  | 10,661 species (>26 Mio. raw records) | GBIF.org (01 July 2021) GBIF Occurrence Download https://doi.org/10.15468/dl.7radyr |
| Occasional photographic records of butterflies (Lepidoptera, Papilionoidea) in Cambodia. 1. The coastal Cardamom foothills (SW Cambodia), 2010-2018 | Kosterin (2019a) | 151 species (140 records) | Acta Biologica Sibirica 5(1):84-105. DOI: [10.14258/abs.v5.i1.5196](http://dx.doi.org/10.14258/abs.v5.i1.5196) |
| Occasional photographic records of butterflies (Lepidoptera, Hesperioidea and Papilionoidea) in Cambodia. 2. Ratanakiri and Mondulkiri Provinces of Eastern Cambodia, 2013-2018. | Kosterin (2019b) | 118 species (216 records) | Acta Biologica Sibirica 5(4):21-37. DOI: [10.14258/abs.v5.i4.6816](http://dx.doi.org/10.14258/abs.v5.i4.6816) |
| The Butterflies of Iran and Iraq | Tshikolovets, Naderi & Eckweiler (2014) | 412 species (11,483 records) | [dd8f3af2-7bd6-460c-9ea0-f55fa5444015](https://mol.org/datasets/dd8f3af2-7bd6-460c-9ea0-f55fa5444015) |
| The Butterflies of Thailand Vol. 1 | Kimura, Aoki, Yamaguchi Uémura & Saito (2011) | 342 species (3,381 records) | [bf98e89a-6372-447d-b88e-8e3576b3f1c3](https://mol.org/datasets/bf98e89a-6372-447d-b88e-8e3576b3f1c3) |
| The Butterflies of Thailand Vol. 2 | Kimura, Aoki, Yamaguchi Uémura & Saito (2014) | 373 species (3,001 records) | [1f59a825-4e54-456d-b621-2c7bea07eb37](file:///C:\Users\stefa\Documents\2._Andere_Projekte\Butterflies_world\Text\1f59a825-4e54-456d-b621-2c7bea07eb37) |
|  |  |  |  |
| ***Butterfly expert range maps*** | | | |
| Mariposas – Butterflies – Argentina | Klimaitis et al. (2018) | 1189 species | [eca9eec5-e2fd-4228-ad61-3a95d18544e3](https://mol.org/datasets/eca9eec5-e2fd-4228-ad61-3a95d18544e3) |
| Sequel to ''The Life Histories of Asian Butterflies Vols. I & II'' | Igarashi & Harada (2014) | 194 species | [f02f73d6-3ff5-4034-9094-1da6f91d24e9](https://mol.org/datasets/f02f73d6-3ff5-4034-9094-1da6f91d24e9) |
| The Life Histories of Asian Butterflies Vol. 1 | Igarashi & Fukuda (1997) | 299 species | [32955004-1f1a-422d-b27f-975c88fc765c](https://mol.org/datasets/32955004-1f1a-422d-b27f-975c88fc765c) |
| The Life Histories of Asian Butterflies Vol. 2 | Igarashi & Fukuda (2000) | 380 species | [142c08aa-7093-44cd-9ab8-d828e0643d7e](https://mol.org/datasets/142c08aa-7093-44cd-9ab8-d828e0643d7e) |
| The complete field guide to butterflies of Australia | Braby (2016) | 408 species | [b37beb0e-9f6a-4e5d-a1f0-3163303ad1fa](https://mol.org/datasets/b37beb0e-9f6a-4e5d-a1f0-3163303ad1fa) |
| Butterflies of Chile | Peña & Ugarte (1996) | 165 species | [822051c1-8543-43fa-b641-be3da923aab8](https://mol.org/datasets/822051c1-8543-43fa-b641-be3da923aab8) |
| The Nymphalidae of China: Part I | Lang (2012) | 423 species | [ccf57b78-639f-4138-9662-2d1275e39f3d](https://mol.org/datasets/ccf57b78-639f-4138-9662-2d1275e39f3d) |
| An illustrated list of the Genus *Delias* Hübner of the world. | Yagishita, Nakano & Morita (1993) | 107 species | [6c08fa74-ab27-43a8-91d1-394296681a48](https://mol.org/datasets/6c08fa74-ab27-43a8-91d1-394296681a48) |
| An illustrated checklist of the genus *Elymnias* Hübner, 1818 (Nymphalidae, Satyrinae) | Wei et al. (2017) | 52 species | DOI: [10.3897/zookeys.676.12579](https://doi.org/10.3897/zookeys.676.12579) |
| Butterflies of Britain and Europe | Tolman (2008) | 411 species | [fedd5e4d-d469-49ee-a58a-eb206a2afe02](https://mol.org/datasets/fedd5e4d-d469-49ee-a58a-eb206a2afe02) |
| Butterflies of the Fiji Islands | Prasad & Waqa-Sakiti (2007) | 35 species | [b522a6b2-ed14-4694-9708-2bf28d446260](https://mol.org/datasets/b522a6b2-ed14-4694-9708-2bf28d446260) |
| Life histories of Korean butterflies | Kim & Ho (2012) | 218 species | [edf51b87-34ba-442b-b98b-5a080f00ded1](https://mol.org/datasets/edf51b87-34ba-442b-b98b-5a080f00ded1) |
| The Butterflies of Kyrgyzstan | Tshikolovets (2005) | 274 species | [3428f989-e644-45c5-9320-7d032fa498dc](https://mol.org/datasets/3428f989-e644-45c5-9320-7d032fa498dc) |
| The Butterflies of Ladak (N.-W. India) | Tshikolovets (2005) | 87 species | [f33371ca-1480-4387-a6e2-91f5fc933712](https://mol.org/datasets/f33371ca-1480-4387-a6e2-91f5fc933712) |
| Butterflies of Mexico and Central America | Glassberg (2007) | 1,594 species | [f072f6ea-20ab-43c0-96f6-5edef46669db](https://mol.org/datasets/f072f6ea-20ab-43c0-96f6-5edef46669db) |
| The Butterflies of Mongolia | Tshikolovets (2009) | 268 species | [d08260ae-09b7-42c9-a597-3ee29874a59a](https://mol.org/datasets/d08260ae-09b7-42c9-a597-3ee29874a59a) |
| Kaufman field guide to butterflies of North America | Brock & Kaufman (2006) | 607 species | [8f316f82-7356-44ee-823d-8f830f241fab](https://mol.org/datasets/8f316f82-7356-44ee-823d-8f830f241fab) |
| New Zealand Butterflies | Gibbs (1980) | 23 species | [f2fc7933-fd26-41a2-846d-f3ed89a3973f](https://mol.org/datasets/f2fc7933-fd26-41a2-846d-f3ed89a3973f) |
| Guide to the Butterflies of the Palearctic Region, Nymphalidae part I, Tribe Argynnini: Argynnis, Issoria, Brenthis, Argyreus | Tuzov & Vozano (2003) | 31 species | [62f163d2-fff4-42c4-9a61-c55c62904817](https://mol.org/datasets/62f163d2-fff4-42c4-9a61-c55c62904817) |
| Guide to the Butterflies of the Palearctic Region, Nymphalidae part II, Tribe Argynnini: Boloria, Proclossiana, Clossiana | Tuzov & Vozano (2006) | 39 species | [25cef51d-ab01-4390-86de-e03e2f3f7ea3](https://mol.org/datasets/25cef51d-ab01-4390-86de-e03e2f3f7ea3) |
| Guide to the Butterflies of the Palearctic Region, Nymphalidae part III. Subfamily Limenitidinae. Tribe Neptini | Bozano (2008) | 53 species | [88b436d9-9941-4d19-99bc-2644d046950e](https://mol.org/datasets/88b436d9-9941-4d19-99bc-2644d046950e) |
| Guide to the Butterflies of the Palearctic Region, Nymphalidae part VI, Family Limenitidinae, Tribes Limenitidini and Chalingini | Gallo & Della Bruna (2013) | 37 species | [05d432ad-3c74-477d-95f9-f048ed47332f](https://mol.org/datasets/05d432ad-3c74-477d-95f9-f048ed47332f) |
| Guide to the Butterflies of the Palearctic Region, Satyrinae part V, Tribe Satyrini: Satyrus, Minois, Hipparchia | Sbordoni et al. (2018) | 53 species | [89229591-6e24-4787-ac3b-034bf8795bde](https://mol.org/datasets/89229591-6e24-4787-ac3b-034bf8795bde) |
| Butterflies of the South East Asian Islands, Volume I: Papilionidae | Tsukada & Nishiyama (1982) | 123 species | [ff1ef946-95b5-46d4-b9f2-9918a62918fe](https://mol.org/datasets/ff1ef946-95b5-46d4-b9f2-9918a62918fe) |
| Butterflies of the South East Asian Islands, Volume II: Pieridae and Danaidae | Yata & Morishita (1985) | 235 species | [049d0544-50b3-4408-8941-f6988c72f6e5](https://mol.org/datasets/049d0544-50b3-4408-8941-f6988c72f6e5) |
| Butterflies of the South East Asian Islands, Volume III: Satyridae, Amathusiidae & Libytheidae | Aoki, et al. (1982) | 214 species | [dd9fe10d-c191-49d3-83e6-ea8134646072](https://mol.org/datasets/dd9fe10d-c191-49d3-83e6-ea8134646072) |
| Butterflies of the South East Asian Islands, Vol. IV: Nymphalidae | Tsukada (1985) | 194 species | [e0f7ad44-375b-4c4f-bae6-c31401a6f57a](https://mol.org/datasets/e0f7ad44-375b-4c4f-bae6-c31401a6f57a) |
| Butterflies of the South East Asian Islands, Vol. V: Nymphalidae | Tsukada (1991) | 160 species | [d73946d2-9ad1-480d-b26b-4afec6052266](https://mol.org/datasets/d73946d2-9ad1-480d-b26b-4afec6052266) |
| The butterflies of Russia: classification, genitalia, keys for identification (Lepidoptera: Hesperioidea and Papilionoidea) | Gorbunov (2001) | 469 species | [afabd30f-96cd-460f-82a1-7197f83e2d9e](https://mol.org/datasets/afabd30f-96cd-460f-82a1-7197f83e2d9e) |
| Butterflies of Eastern Europe, Urals and Caucasus | Tshikolovets (2003) | 291 species | [fe4b9fd2-7da6-46b8-8bef-754044461210](https://mol.org/datasets/fe4b9fd2-7da6-46b8-8bef-754044461210) |
| Butterflies of South Africa | Woodhall (2005) | 652 species | [79361741-0668-4e77-933c-1eac68316fd9](https://mol.org/datasets/79361741-0668-4e77-933c-1eac68316fd9) |
| The Butterflies of Altai, Sayans and Tuva (South Siberia) | Tshikolovets et al. (2009) | 243 species | [08653f6b-4204-4ac3-84a8-68ac2b52a4e4](https://mol.org/datasets/08653f6b-4204-4ac3-84a8-68ac2b52a4e4) |
| The Butterflies of Tajikistan | Tshikolovets (2003) | 281 species | [531b17f2-4185-4d32-b95b-a2c5a3863e53](https://mol.org/datasets/531b17f2-4185-4d32-b95b-a2c5a3863e53) |
| Butterflies of Transbaikal Siberia | Tshikolovets (2002) | 214 species | [269074a8-8a8b-4ad4-9896-6639085a3207](https://mol.org/datasets/269074a8-8a8b-4ad4-9896-6639085a3207) |
| The Butterflies of Caucasus and Transcaucasia (Armenia, Azerbaijan, Georgia, and Russian Federation) | Tshikolovets (2012) | 291 species | [c26746e9-a77c-4caa-a74e-b5dc1608690d](https://mol.org/datasets/c26746e9-a77c-4caa-a74e-b5dc1608690d) |

**Supplementary Table 2 | Dissimilarity in species composition of biogeographical realms.** Dissimilarities were calculated using Chao’s dissimilarity index based on the aggregated number of grids per species and biogeographical realm (for *n* see Fig. 2).

|  | Afrotropic | Australasia | Indomalayan | Nearctic | Neotropic | Oceania |
| --- | --- | --- | --- | --- | --- | --- |
| Afrotropic |  |  |  |  |  |  |
| Australasia | 0.949 |  |  |  |  |  |
| Indomalayan | 0.955 | 0.731 |  |  |  |  |
| Nearctic | 0.992 | 0.987 | 0.988 |  |  |  |
| Neotropic | 0.947 | 0.993 | 0.993 | 0.735 |  |  |
| Oceania | 0.976 | 0.878 | 0.952 | 0.970 | 0.989 |  |
| Palearctic | 0.952 | 0.957 | 0.741 | 0.882 | 0.994 | 0.966 |


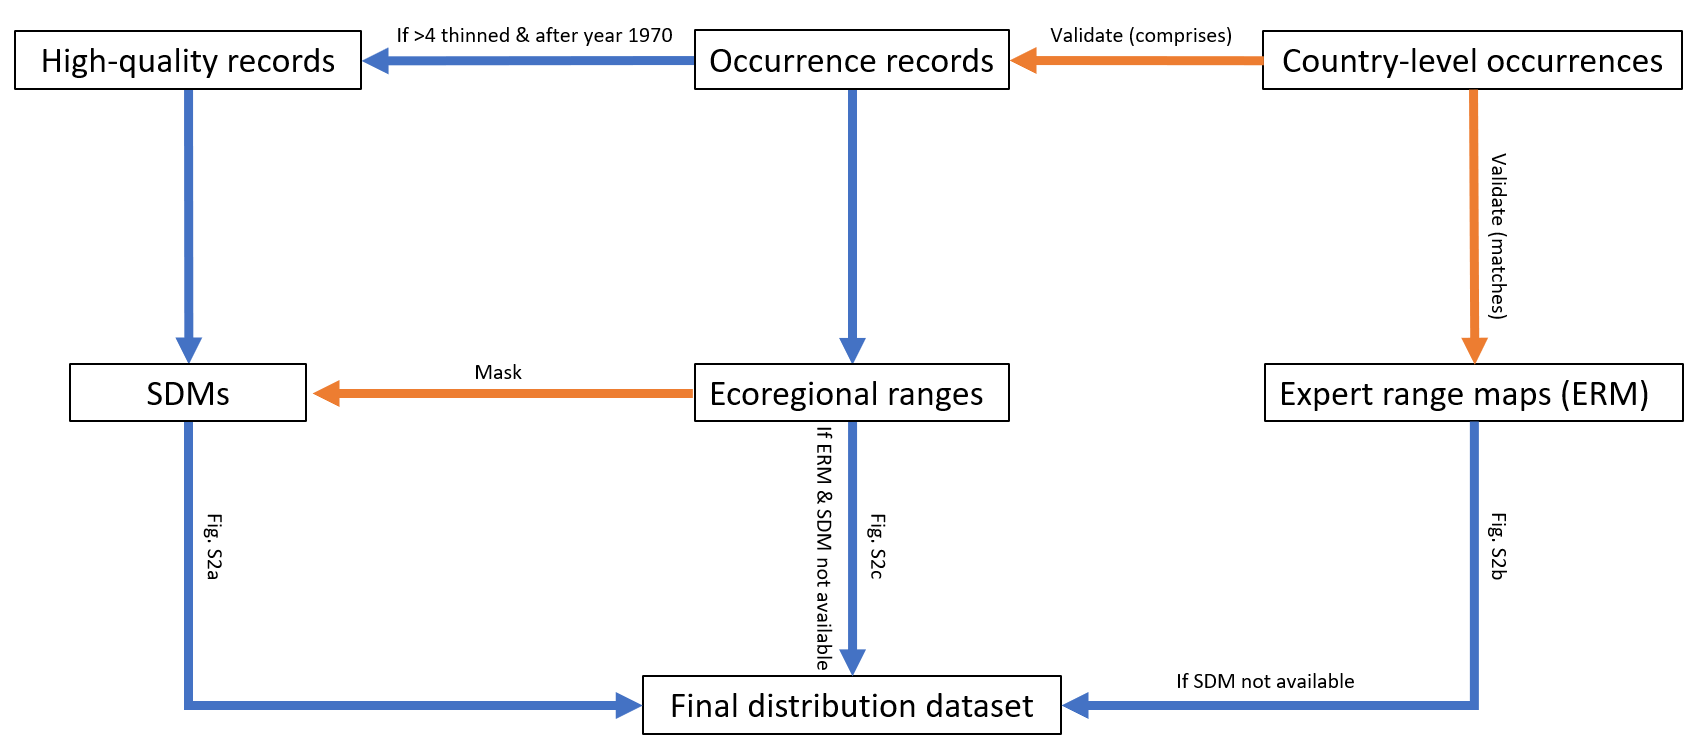


**Supplementary Fig.1 | Data integration scheme.** The core product is a composite of 6,650 species distribution models, expert range maps for additional 881 species and ecoregional range maps for additional 5,137 species. Orange arrows in the scheme are informative and blue are processing links. Ecoregional range maps are intersections of cleaned occurrence data and the terrestrial ecoregions of the world. SDMs use high-quality (cleaned) records and the binary predictions are masked by ecoregional ranges of species. If there were too few data or the quality of the species distribution model was not sufficient, expert range maps were used. If no expert range map was available or the available map did not cover all checklist countries, ecoregional ranges were used.

**
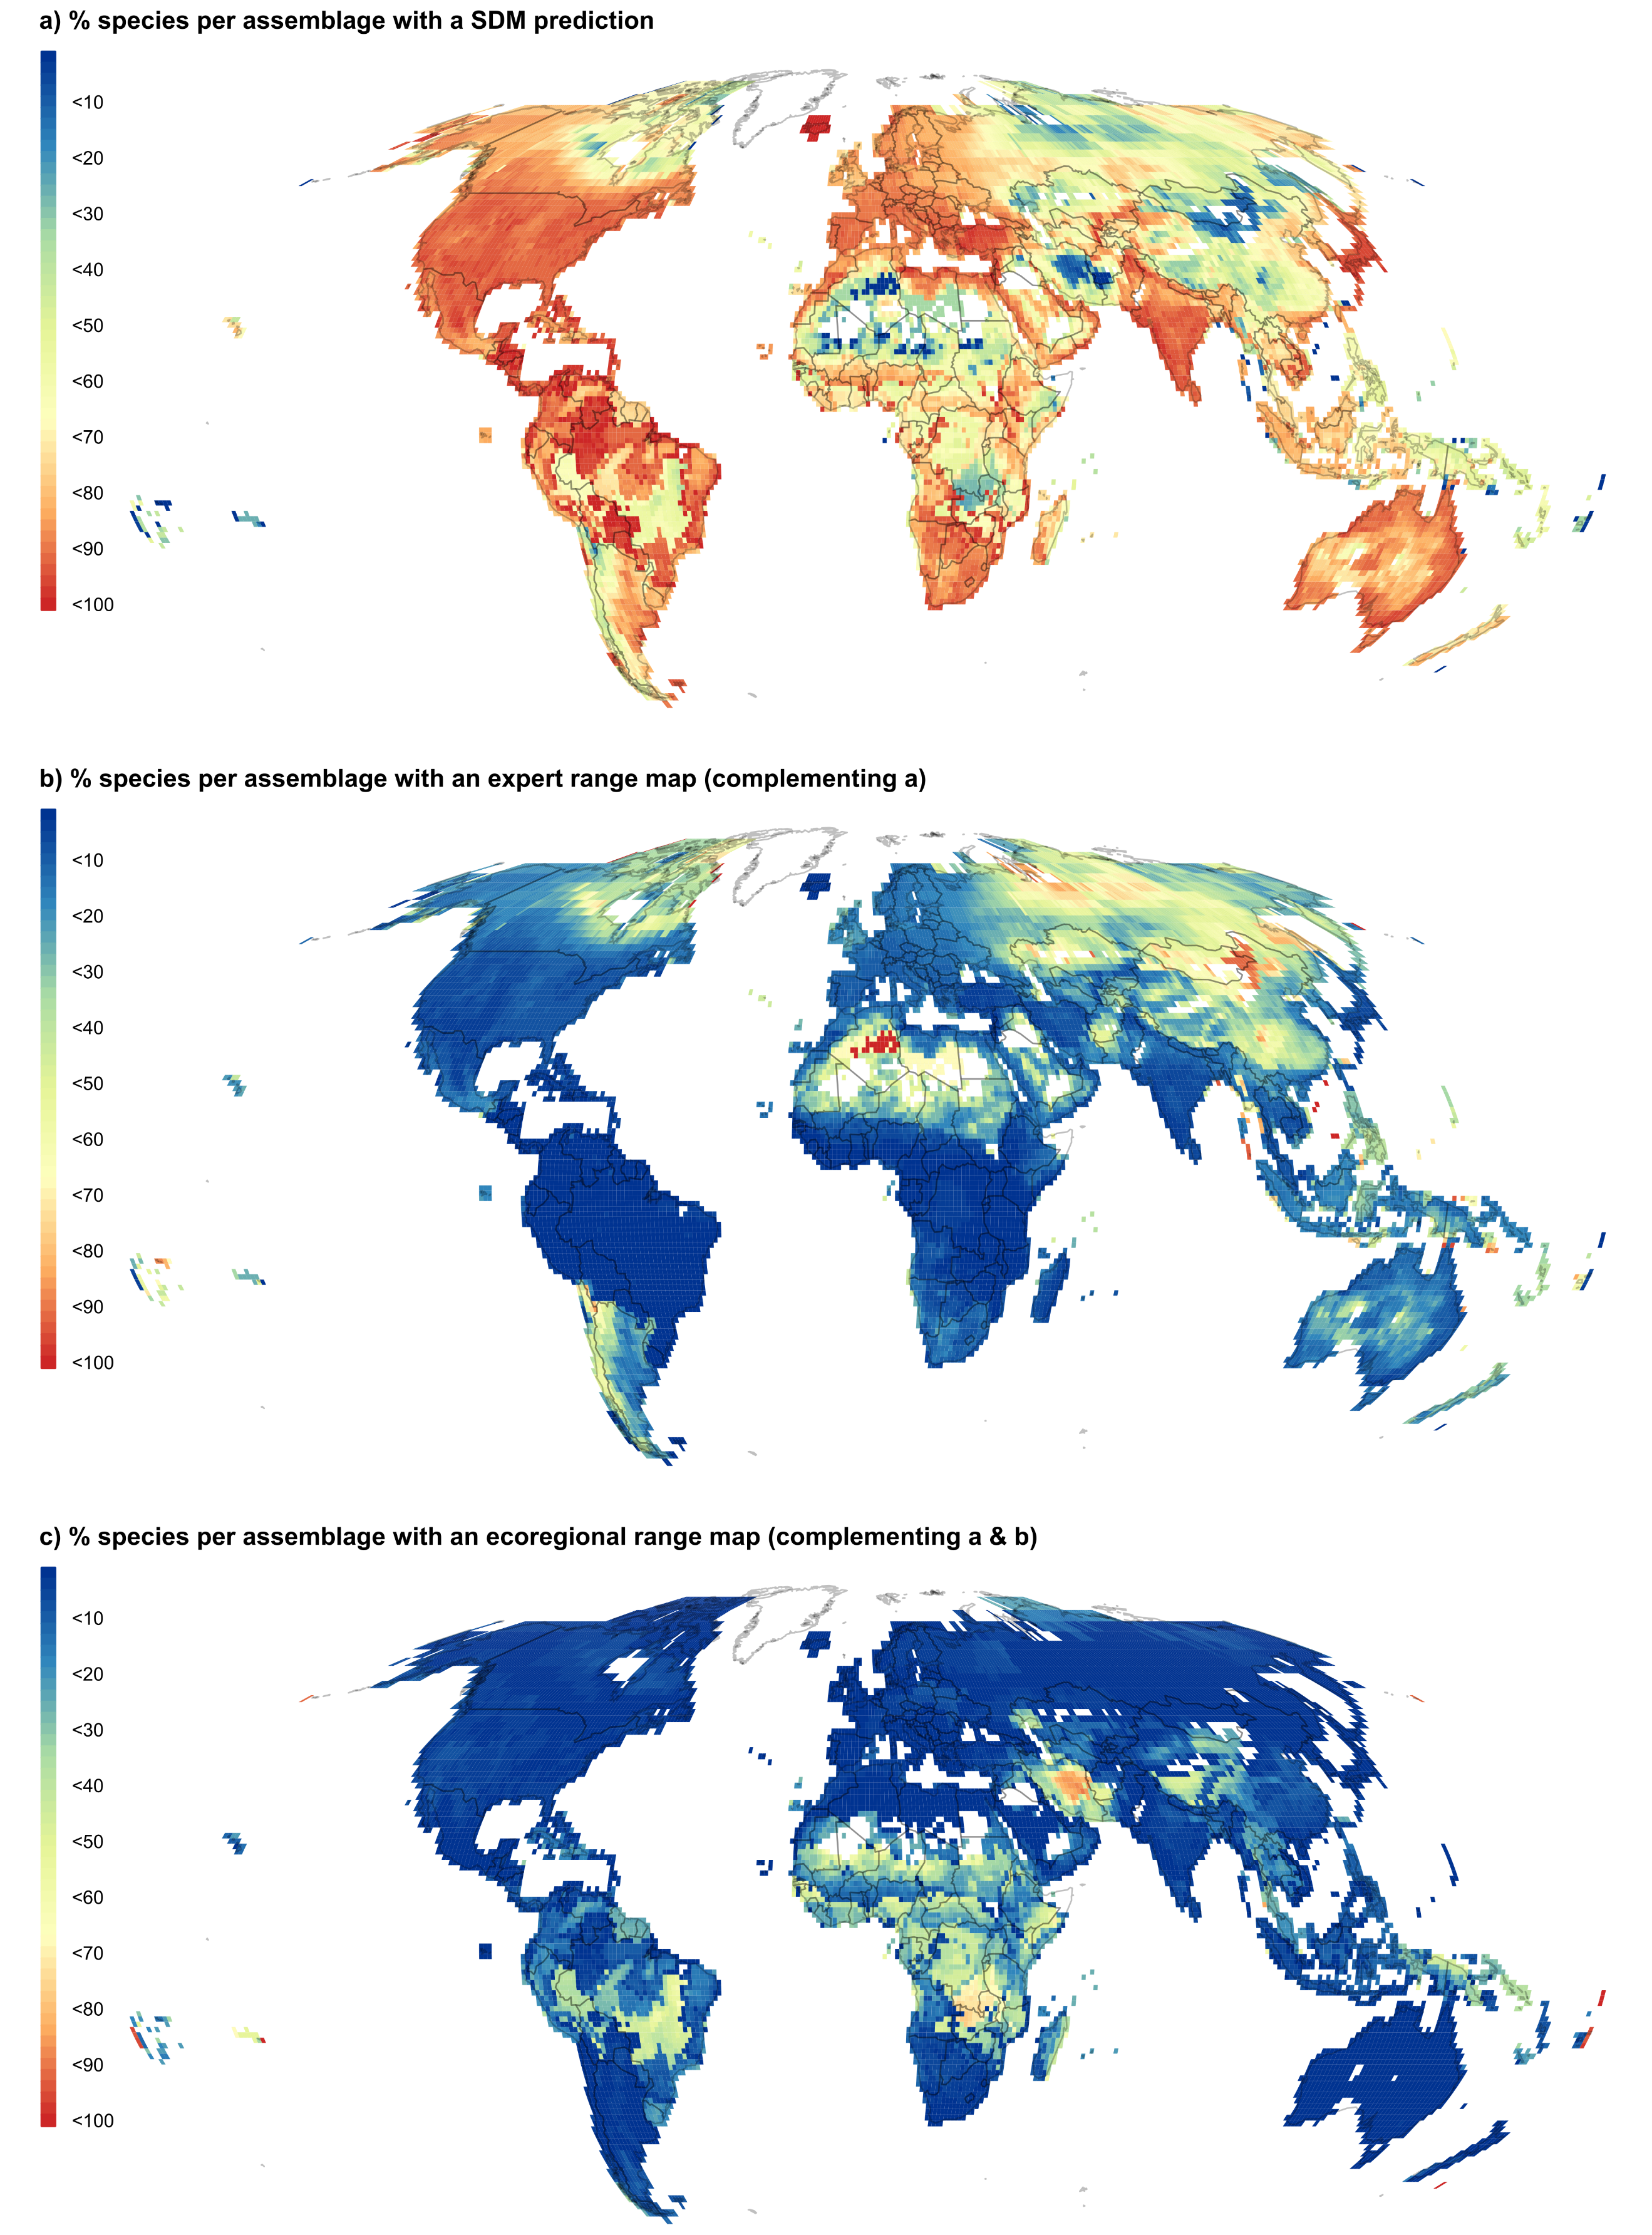
**

**Supplementary Fig.2 | Data availability of different types of distributional data.** Maps show the proportion of butterfly species for with **a**, species distribution models (6,650 species) **b**, expert range maps (additional 881 species) or **c**, ecoregional range maps (additional 5,137 species) were used.


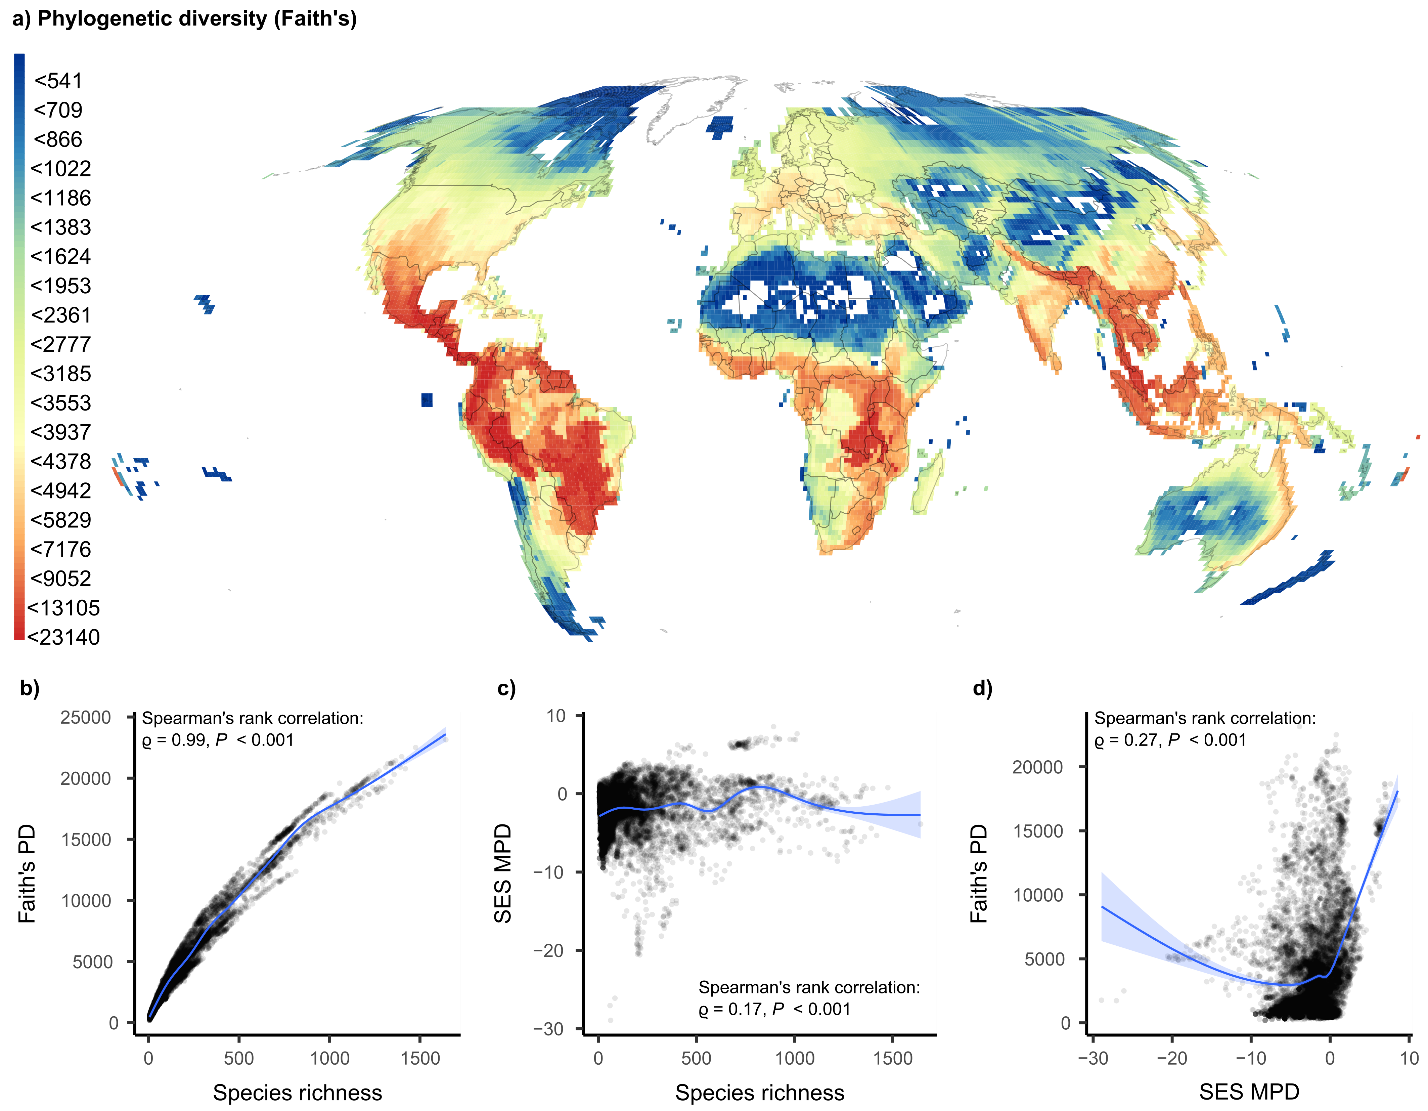


**Supplementary Fig.3 | Global pattern of phylogenetic diversity (Faith’s PD).** Phylogenetic diversity calculated as the sum of branch lengths of the minimal spanning tree butterfly species co-occurring in a grid (110 km ×110 km). In all main analysis an alternative measure of PD (standardized effect sizes of mean pairwise distances) was used because of the strong dependence of Faith’s PD is technically strongly correlated to species richness. The relationship of species richness and Faith’s PD is shown in the inset scatterplot.

**
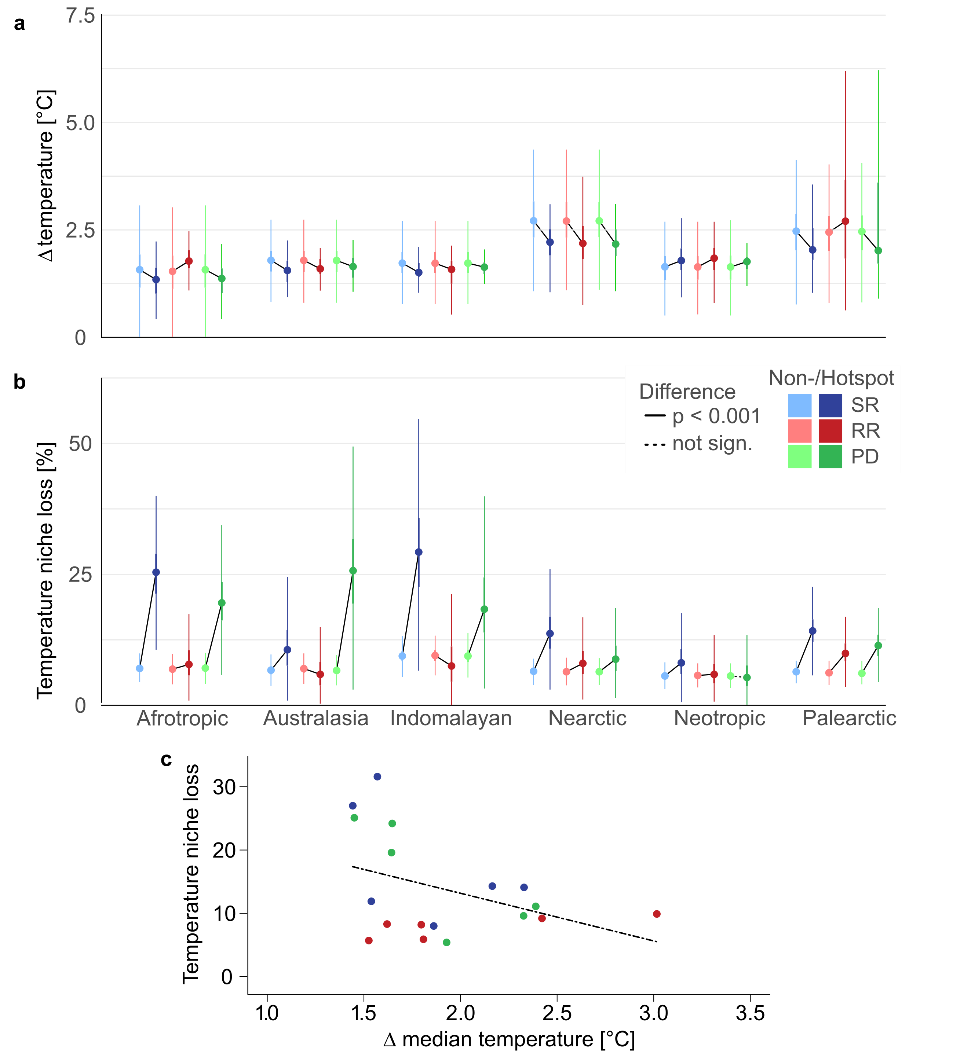
**

**Supplementary Fig.4 | Projected future temperature niche loss and temperature difference in non-hotspots and hotspots. a**, Temperature difference and **b**, temperature niche loss for non-hotspots and hotspots (for *n* and location see Fig. 2) across realms and aspects of butterfly diversity under global warming (RCP 8.5). **c**, Relationship of temperature niche loss and temperature difference until the year 2070 among realm-level hotspots of species richness, range rarity, and phylogenetic diversity under an ensemble model for the scenario RCP 4.5. Plots in (**a**) and (**b**) show median values and the inner interquartile range of values and its 1.5-fold (dots, thick/thin bars). Notably, projected future temperature niche loss and temperature difference appear unrelated (Spearman’s ρ = –0.43; P = 0.072; n = 18). Further analyses comparing temperature niche loss and temperature difference between non-hotspots and hotspots can be found in Extended Data Fig. 1 and 3.


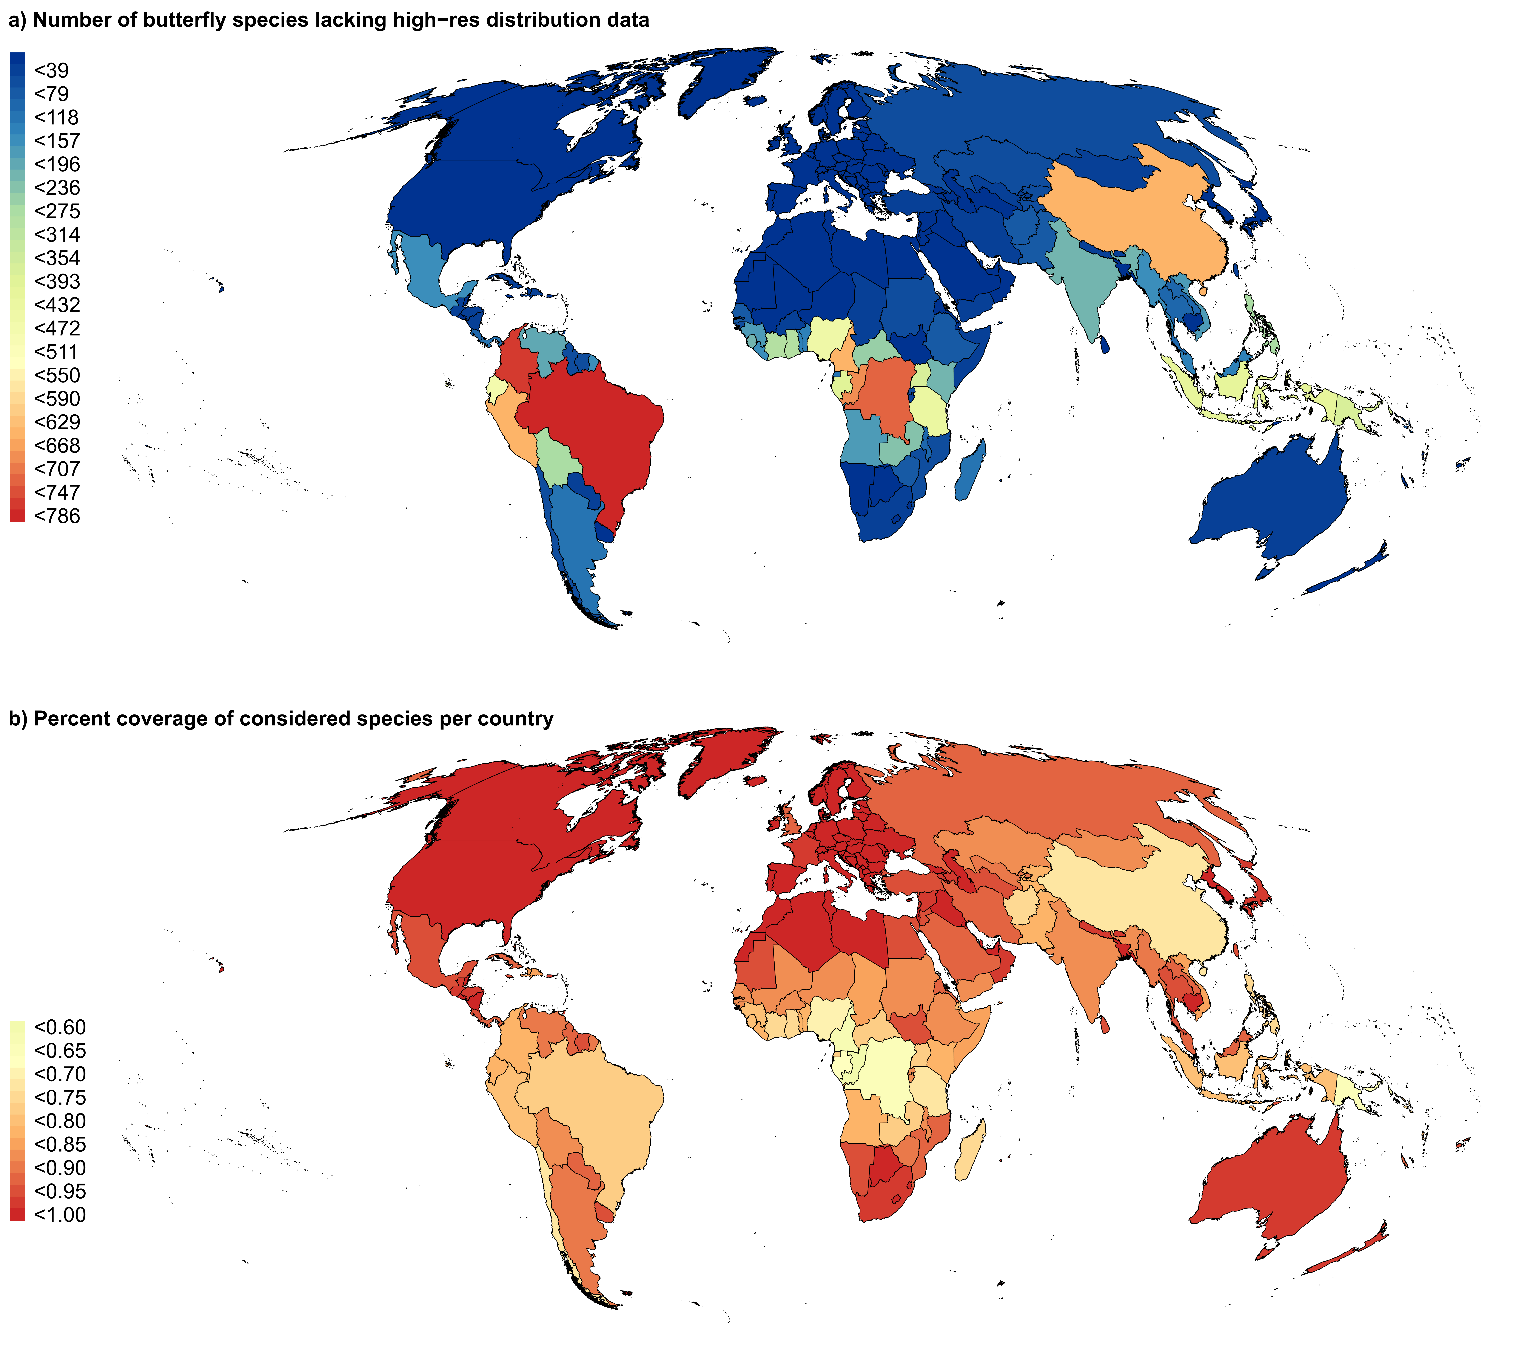


**Supplementary Fig.5 | National coverage of distribution data. a**, Absolutecount of species without high resolution distribution data (SDMs, expert range maps or ecoregional range maps), **b**,Species countrelative to the total of formally described species in a country (proportion; 19,317 species total; 13 species were lacking country-level distribution information). Color class intervals are scaled to equally wide classes for (**a**) and to equal frequency classes for (**b**). The maps are shown in a Mollweide equal-area projection. The proportion of included species was negatively associated with the number of accepted species per country (Spearman’s rank correlation: ρ = –0.59, *n* = 248, *P* < 0.001).

**
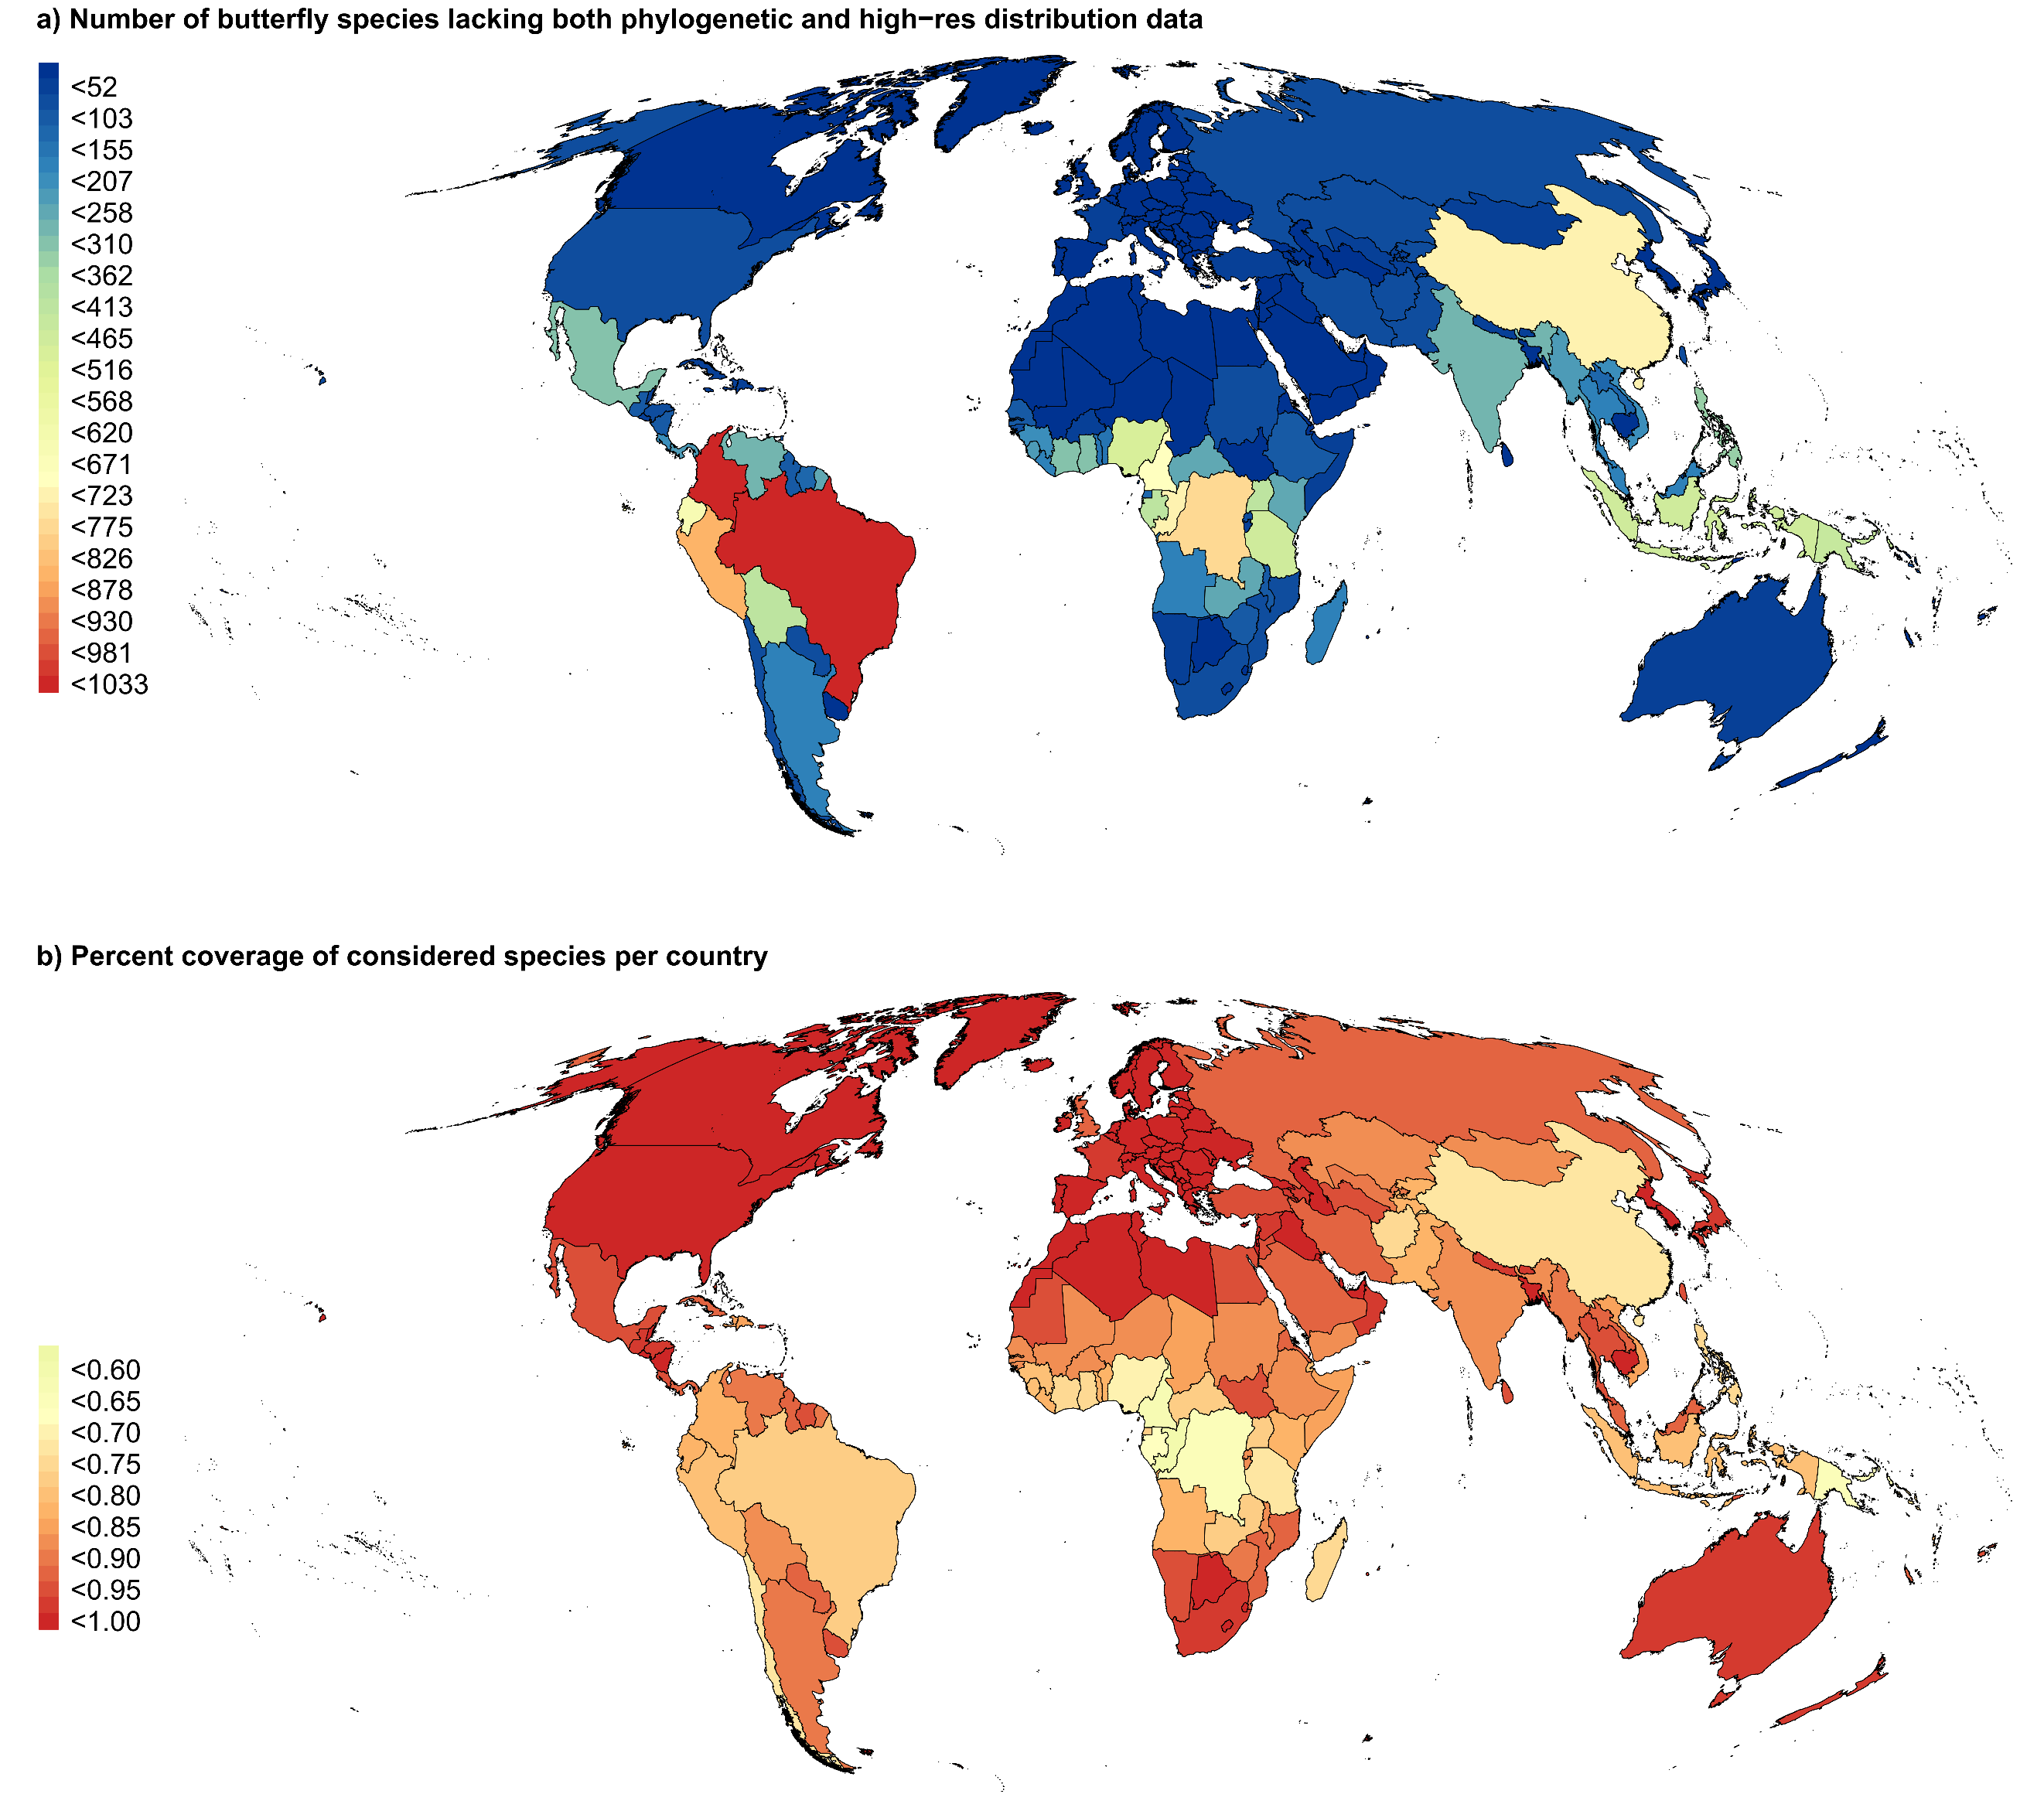
**

**Supplementary Fig.6 | National coverage of combined phylogenetic and distribution data. a**, Absolutecount of excluded species, **b**,Species countrelative to the total of formally described species in a country (proportion; 19,317 species total; 13 species were lacking country-level distribution information). Color class intervals are scaled to equally wide classes for (**a**) and to equal frequency classes for (**b**). Maps are shown in a Mollweide equal-area projection. The proportion of included species was negatively associated with the number of accepted species per country (Spearman’s rank correlation: ρ = –0.53, *n* = 248).


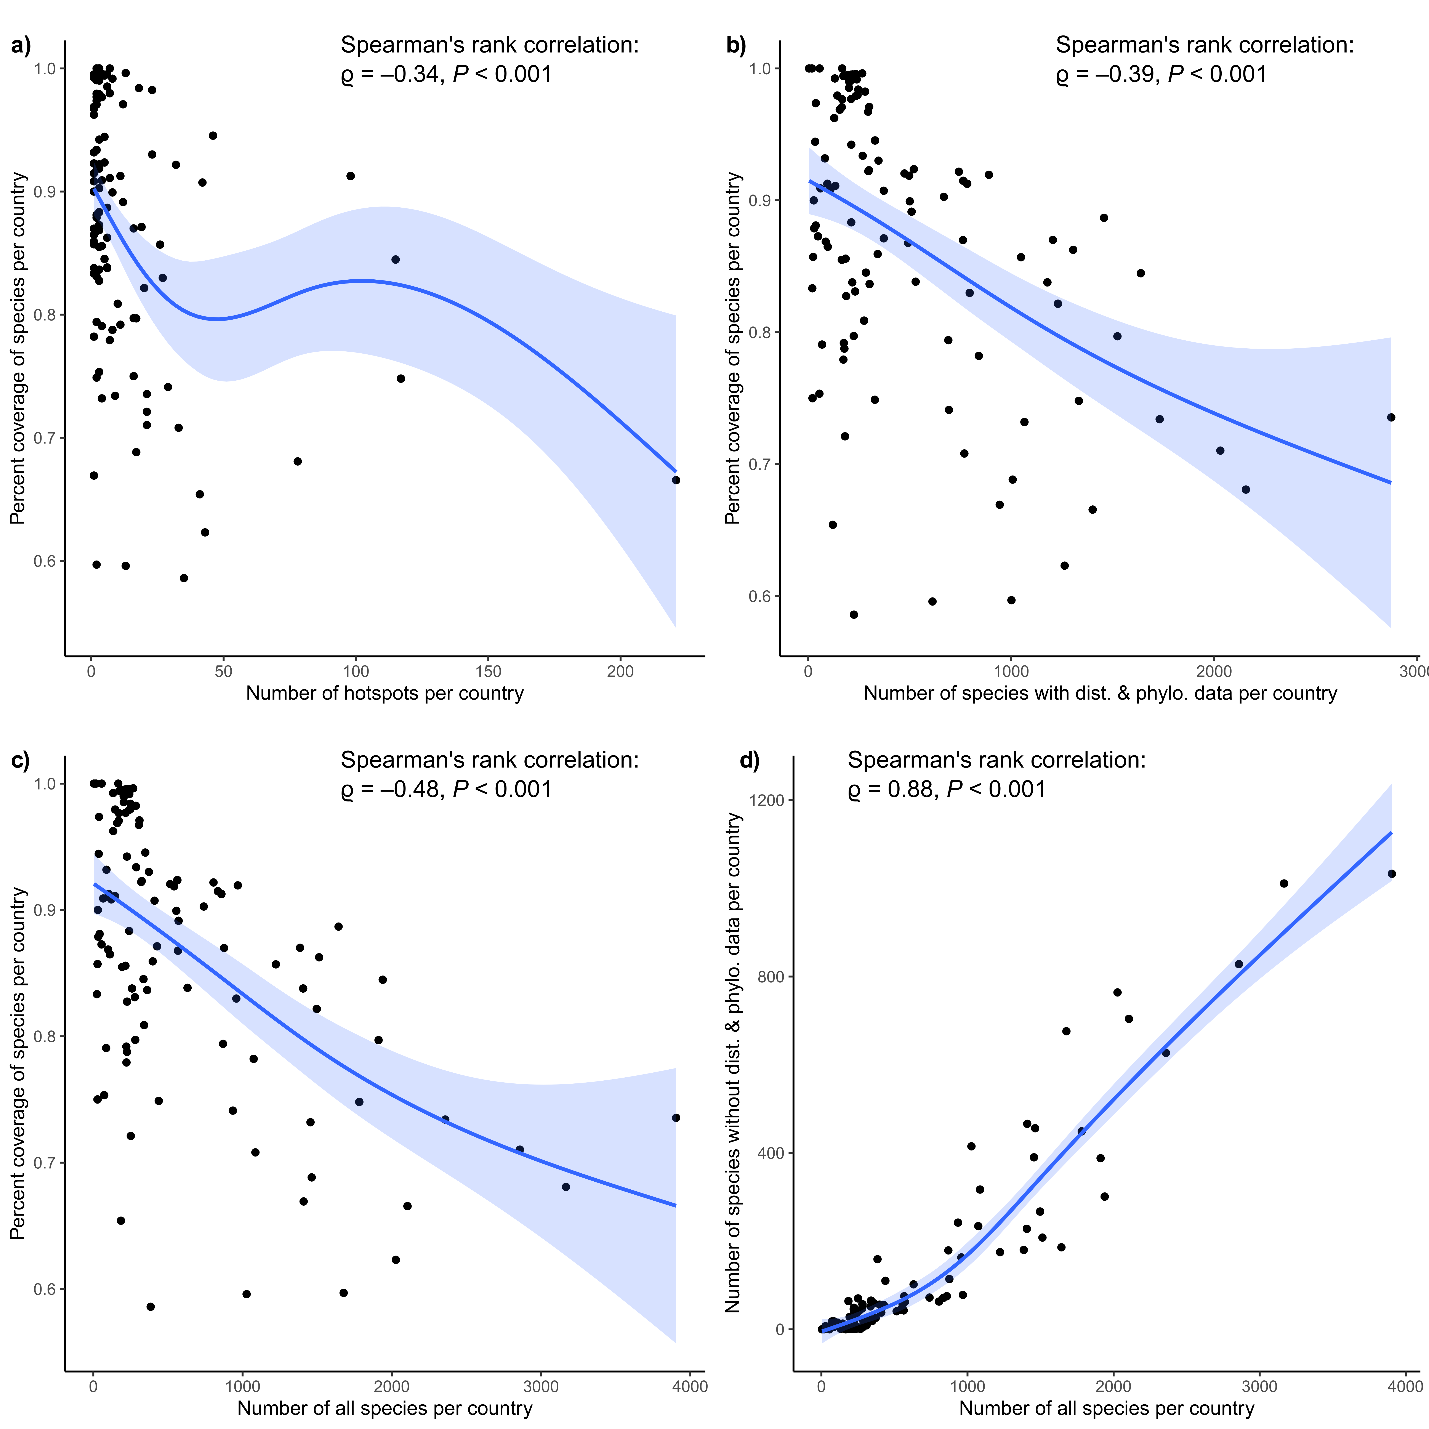


**Supplementary Fig.7 | Data coverage.** Relationships of the percentage of species with phylogenetic and distribution data relative to total number of accepted butterfly species with the number of identified hotspots (any: SR, rarity, or PD) (**a**), the number of species with both phylogenetic and distribution data (**b**) and the number of accepted species per country (**c**). **d**, Relationship of the number of species without phylogenetic or distribution data and the number of all accepted species per country (*n* = 128 countries with at least one hotspot). Spline-based smoothed regressions are only provided for visualizing trends. Statistics in the inset of each figure provide results from Spearman’s rank correlations of the relationships. If the availability of data would have biased the hotspot identification, more hotspots should be found in countries with greater coverage. Our results show the opposite (**a**) and suggest this is results from lesser covered countries having a greater number of species (**b, c**) and there top-ranked position does not change even when adding hundreds of currently missing species (**d**, i.e. the number of included species is monotonically positively related to the number of all accepted species). For maps of the species coverage per country refer to Supplementary Fig. 6


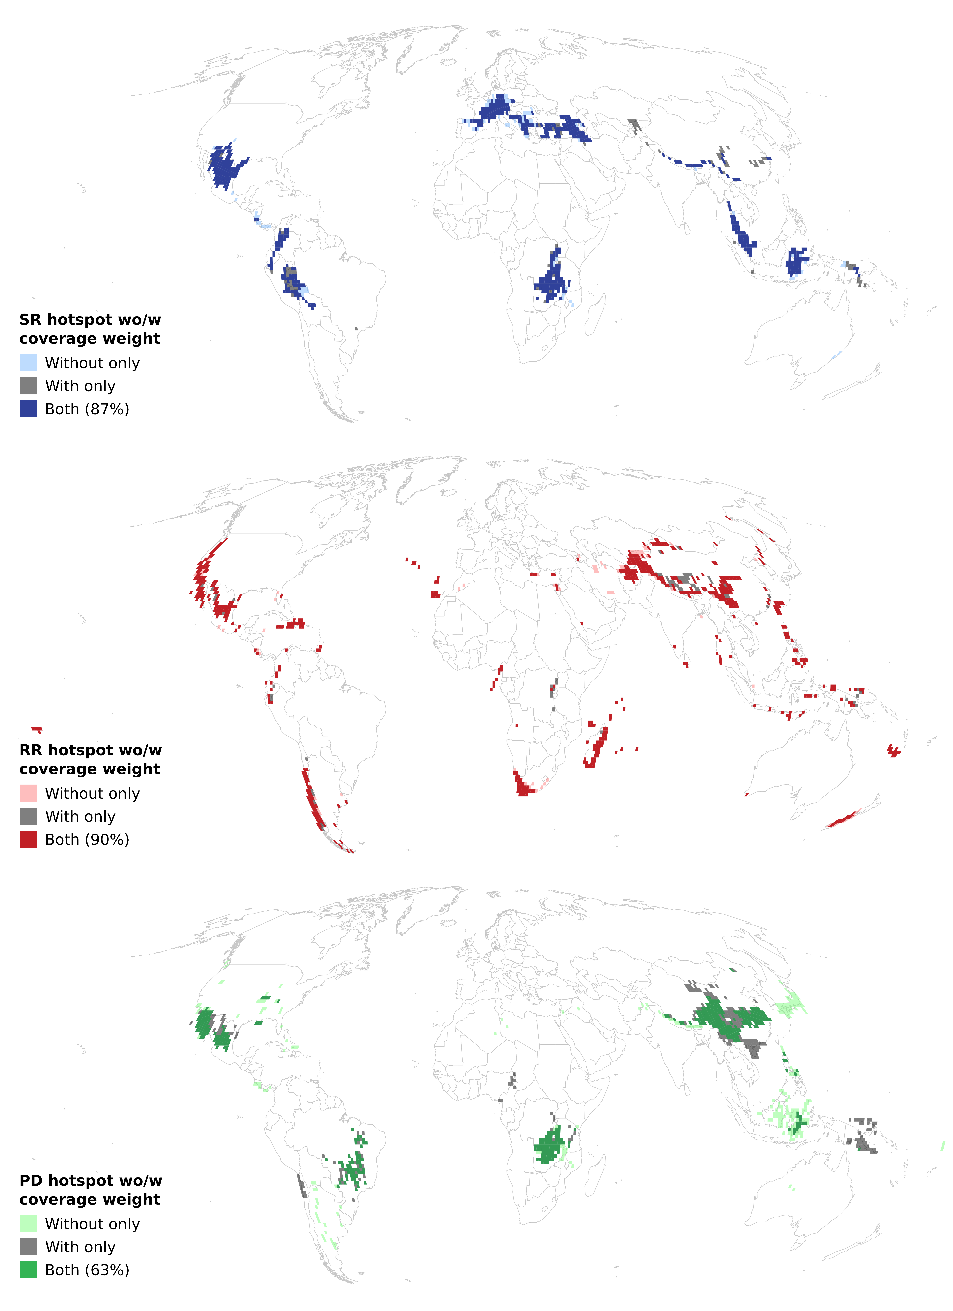


**Supplementary Fig.8 | Robustness of hotspot locations against missing data.** Hotspots (top 5%) of butterfly species richness, range rarity, and phylogenetic diversity across realms, with adjustments made for the diversity value of cells based on country-specific species coverage (see Supplementary Fig. 2, 3) as inverse weight. Hotspots robust to weighting are depicted in full colors, while hotspots identified only prior to weighting are shown as light-colored cells. Hotspots newly identified following the coverage-weighting are shown as dark gray cells.


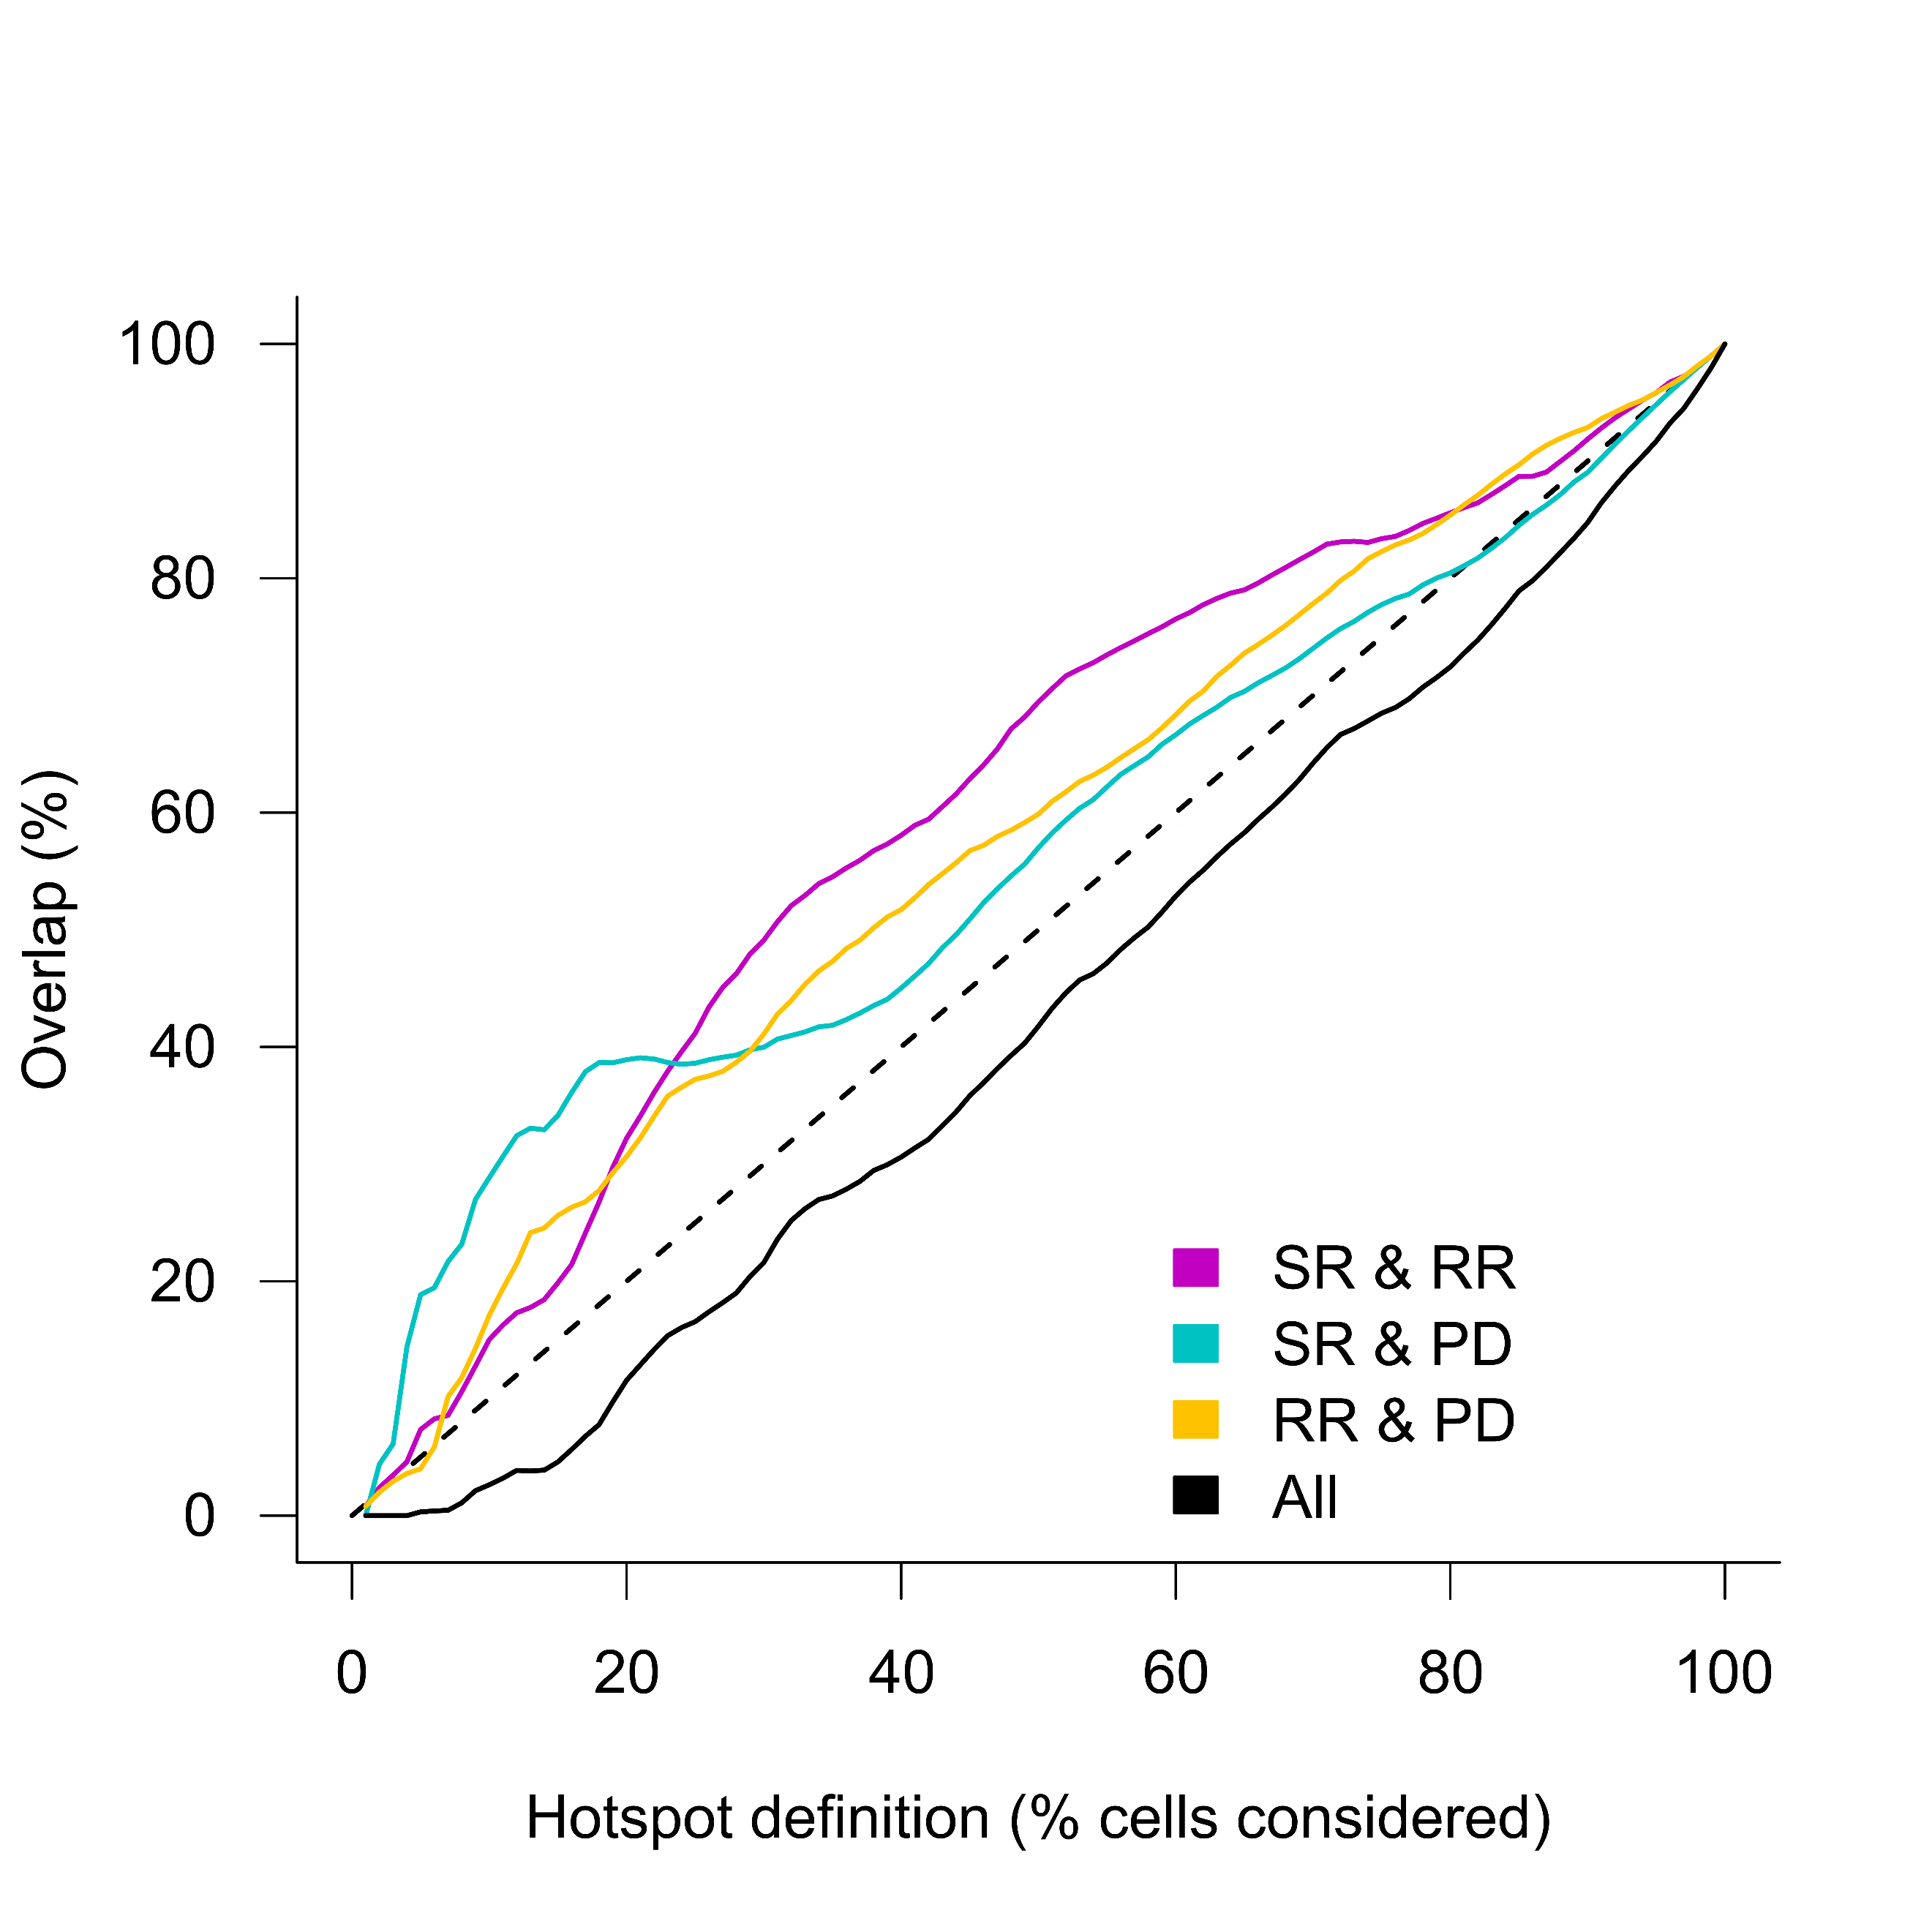


**Supplementary Fig.9 | Robustness of congruence among diversity aspects to an expanded hotspot definition.** Overlap of among hotspots of species richness, range rarity and phylogenetic diversity (SR, RR, PD) across varying hotspot definitions, ranging from 1% to 100% of the total number of cells (12,515), in 1% increments.


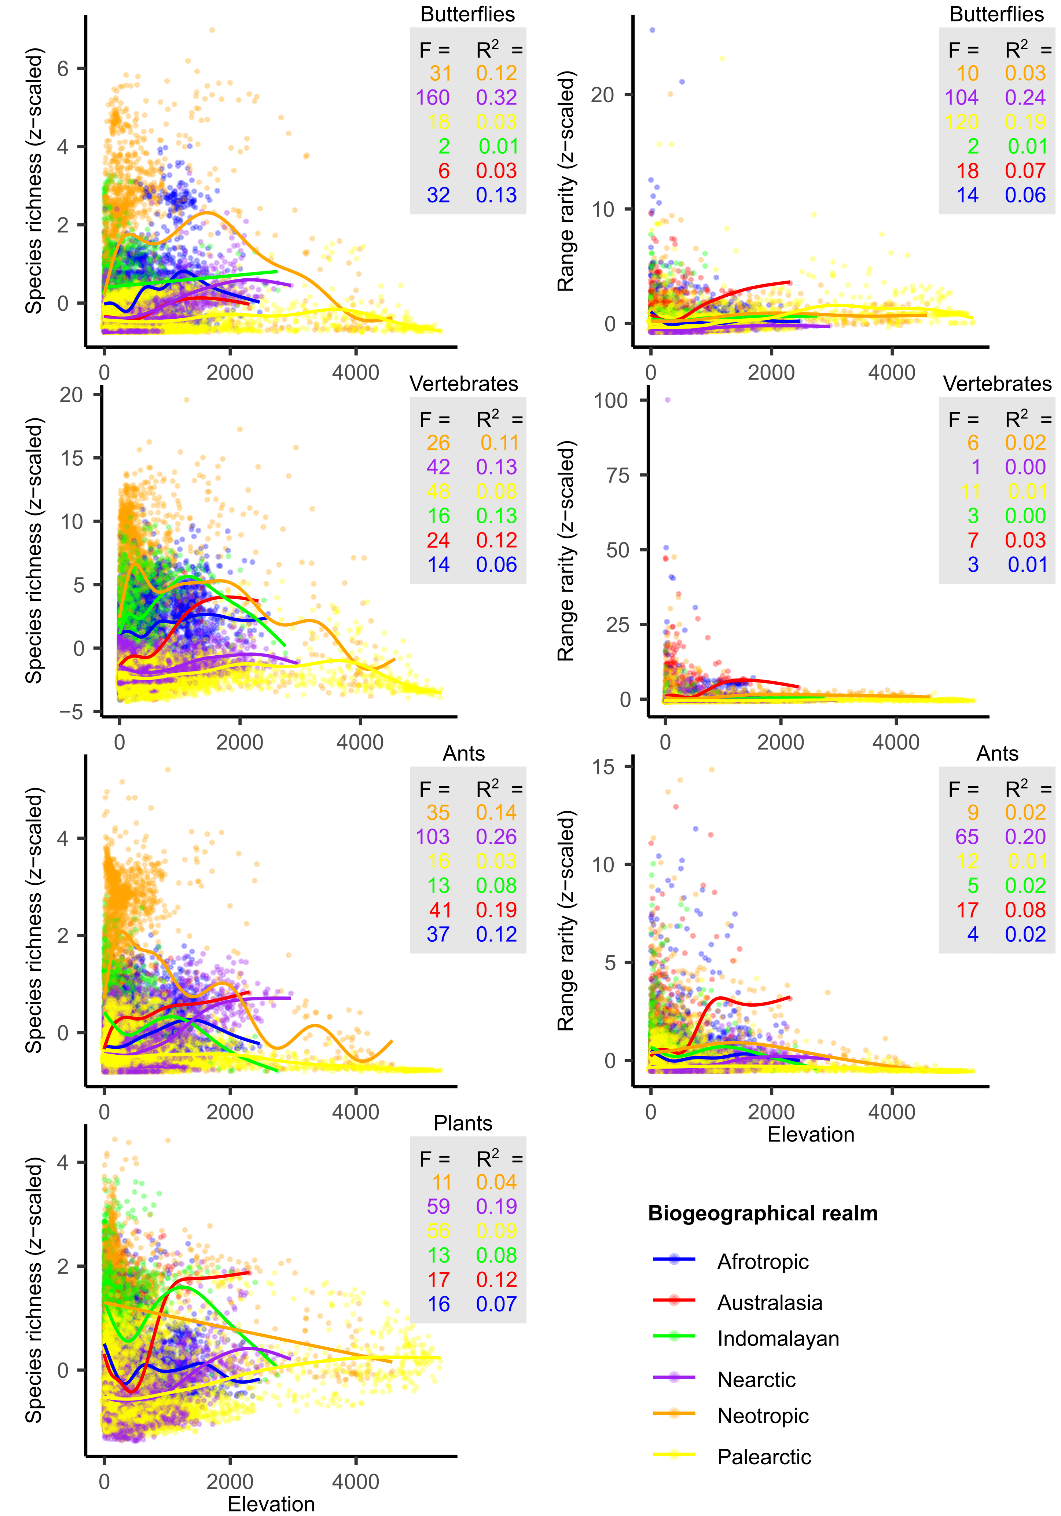


**Supplementary Fig.10 | Relationships of species richness and range rarity with elevation for realms and taxa**. Elevational gradients of standardized (z-scaled) species richness and range rarity of butterfly, vertebrate, ant, and plant assemblages (spline-based smoothed regression). F-values and explained variance (R2) of spline-based smoothed regressions per realm and taxon are shown in inset boxes. Values for vertebrates were individually standardized and subsequently summed up for each assemblage.
